# Supplementary material for: Deficiencies in both starch synthase IIIa and branching enzyme IIb lead to a significant increase in amylose in SSIIa-inactive japonica rice seeds
Source: Oxford University Press journal article supplement (doi:10.1093/jxb/eru310), 2014-07-28
Supplement: eru310_Supplementary_Data.zip [file eru310_Supplementary_Data.zip]

Archive with 1 entries (1 files):
- jexbot123794_file001.pdf
