# Supplementary material for: Deficiencies in both starch synthase IIIa and branching enzyme IIb lead to a significant increase in amylose in SSIIa-inactive japonica rice seeds
Source: Oxford University Press journal article supplement (doi:10.1093/jxb/eru310), 2014-07-28
Supplement: eru310_Supplementary_Data.zip [file eru310_Supplementary_Data.zip › jexbot123794_file001.pdf]

Deficiencies in both starch synthase (SS) IIIa and branching enzyme IIb lead to a significant increase in amylose in SSIIa inactive japonica rice seeds.

*Hiroki Asai, Natsuko Abe, Ryo Matsushima, Naoko F Oitome, Naoko Crofts, Yasunori Nakamura, Naoko Fujita*

## SUPPLEMENTARY DATA

**Supplementary Table 1.** The composition of carbohydrate content (weight %) in the endosperm starch fractions separated by gel filtration chromatography (Toyopearl HW55S/HW50S x 3).

| Lines                          |                          | Frac. I <sup>a</sup><br>(%) | Frac. II<br>(%)         | Frac. III<br>(%)        | TAC <sup>e</sup><br>(%) | III/II                 |
|--------------------------------|--------------------------|-----------------------------|-------------------------|-------------------------|-------------------------|------------------------|
| WT<br>(Nipponbare)             | starch <sup>b</sup>      | 21.2±0.3 <sup>d,h</sup>     | 20.3±0.1 <sup>h</sup>   | 58.5±0.3 <sup>h</sup>   | 18.2 <sup>h</sup>       | 2.9±0.0 <sup>h</sup>   |
|                                | amylopectin <sup>c</sup> | 3.0±0.4                     | 17.7±0.9 <sup>h</sup>   | 54.4±1.8 <sup>h</sup>   | -                       | 3.1±0.1 <sup>h</sup>   |
| WT<br>(Kinmaze)                | starch                   | 21.6±2.0 <sup>h</sup>       | 21.0±0.7 <sup>h</sup>   | 57.4±2.0 <sup>h</sup>   | 19.3 <sup>h</sup>       | 2.8±0.2 <sup>h</sup>   |
|                                | amylopectin              | 2.3±0.3                     | 21.3±0.7 <sup>h</sup>   | 59.7±2.3 <sup>h</sup>   | -                       | 2.8±0.2 <sup>h</sup>   |
| <i>ss3a</i><br>( <i>e1</i> )   | starch                   | 30.7±1.0 <sup>f,g</sup>     | 13.9±0.9 <sup>f,g</sup> | 55.4±0.9 <sup>f,g</sup> | 27.6 <sup>f,g</sup>     | 4.0±0.3 <sup>f,g</sup> |
|                                | amylopectin              | 3.1±0.3                     | 12.1±0.5 <sup>f,g</sup> | 53.1±1.3 <sup>g</sup>   | -                       | 4.4±0.1 <sup>f,g</sup> |
| <i>be2b</i><br>( <i>EM10</i> ) | starch                   | 28.1±0.1 <sup>g</sup>       | 39.7±0.2 <sup>f,g</sup> | 32.2±0.3 <sup>f,g</sup> | 26.8 <sup>g</sup>       | 0.8±0.0 <sup>f,g</sup> |
|                                | amylopectin              | 1.3±0.0 <sup>f,g</sup>      | 38.3±0.4 <sup>f,g</sup> | 32.3±0.4 <sup>f,g</sup> | -                       | 0.8±0.0 <sup>f</sup>   |
| <i>ss3a/be2b</i><br>(#4019)    | starch                   | 45.1±1.5                    | 27.5±0.3                | 27.4±1.1                | 42.6                    | 1.0±0.0                |
|                                | amylopectin              | 2.5±0.1                     | 27.2±0.4                | 24.4±0.3                | -                       | 0.9±0.0                |

<sup>a</sup>Three fractions (Fr. I, II and III) was divided at the valleys of the carbohydrate content curve equipped with refractive index detectors (Figure 5).

<sup>b</sup>Total carbohydrate content was 100 %.

<sup>c</sup>The area for Fr. II and Fr. III of amylopectin were superimposed on those of the starch, and the amount of the Fr. I of amylopectin (extra long chain) was calculated.

<sup>d</sup>Mean±SE of at least two replications.

<sup>e</sup>True amylose content=apparent amylose content (Fr. I of starch) – extra long chains (Fr. I of amylopectin).

<sup>f</sup>Significant differences between parental mutant lines and the WT by t-test at P<0.05.

<sup>g</sup>Significant differences between the parental mutant lines and the *ss3a/be2b* mutant by t-test at P<0.05.

<sup>h</sup>Significant differences between the *ss3a/be2b* mutant line and the WT by t-test at P<0.05.

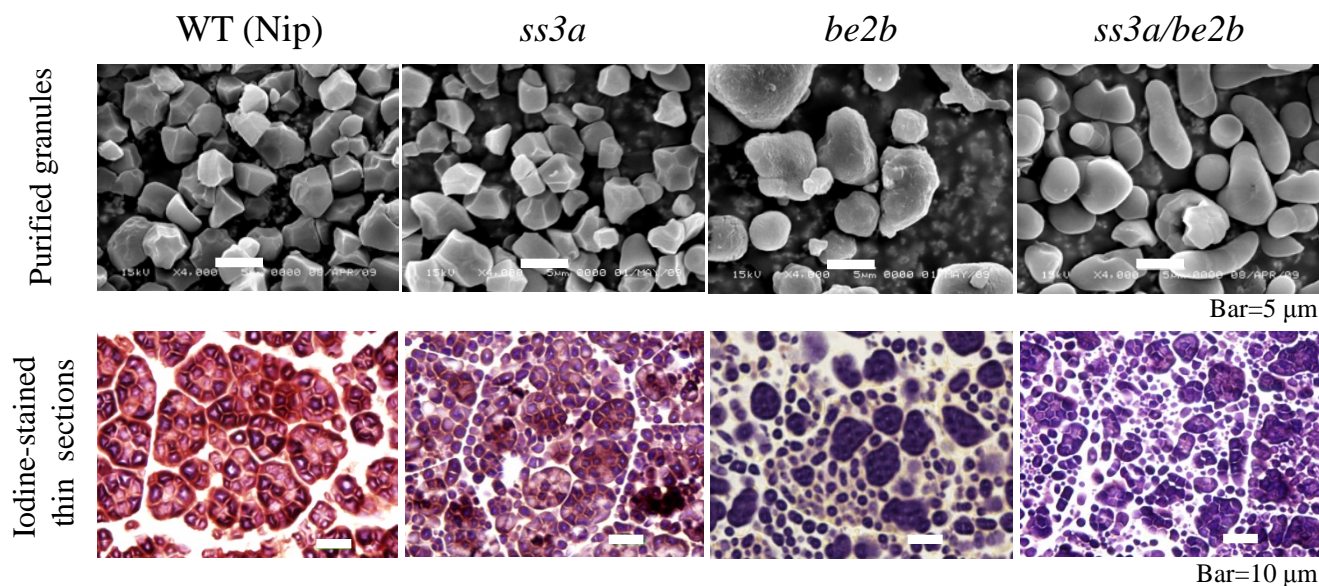

**Supplementary Figure 1.** Observations of starch granules and endosperm cells. Scanning electron micrographs of purified starch granules (upper panels). Bars=5  $\mu$ m. Thin-section of mature endosperm stained with iodine observed by light microscopy (lower panels). Bars=10  $\mu$ m.
